# Supplementary material for: Predicting Future Flood Risks in the Face of Climate Change: A Frequency Analysis Perspective
Source: MDPI journal article supplement (doi:10.3390/w15223883), 2023-11-07
Supplement: s1 [file s1]

## The Relationship between L-Moments and LH-Moments

Relations for LH-moments [1,6,7]:

$$L_1^\eta = E \left[ X_{(\eta+1)(\eta+1)} \right]$$

$$L_2^\eta = \frac{1}{2} \cdot E \left[ X_{(\eta+2)(\eta+2)} - X_{(\eta+1)(\eta+2)} \right]$$

$$L_3^\eta = \frac{1}{3} \cdot E \left[ X_{(\eta+3)(\eta+3)} - 2 \cdot X_{(\eta+2)(\eta+3)} + X_{(\eta+1)(\eta+3)} \right]$$

$$L_4^\eta = \frac{1}{4} \cdot E \left[ X_{(\eta+4)(\eta+4)} - 3 \cdot X_{(\eta+3)(\eta+4)} + 3 \cdot X_{(\eta+2)(\eta+4)} - X_{(\eta+1)(\eta+4)} \right]$$

unde  $\eta = 0, 1, 2, 3, \dots$  For  $\eta = 0$ , the method is identical to the L-moments method.

Based on these LH-moments, the reports  $\tau_{H2}, \tau_{H3}, \tau_{H4}$  are defined as follows:

$$\tau_{H2} = \frac{L_2^\eta}{L_1^\eta} - \text{represents LH-CV (coefficient of LH-variation)}$$

$$\tau_{H3} = \frac{L_3^\eta}{L_2^\eta} - \text{represents LH-Cs (LH-skewness)}$$

$$\tau_{H4} = \frac{L_4^\eta}{L_2^\eta} - \text{represents LH-Ck (LH-kurtosis)}$$

The relations between the high-order linear moments and the normalized weighted moments are the following [19,24]:

$$L_1^\eta = B_\eta$$

$$L_2^\eta = \frac{(\eta+2)}{2} \cdot (B_{\eta+1} - B_\eta)$$

$$L_3^\eta = \frac{(\eta+3)}{6} \cdot ((\eta+4) \cdot B_{\eta+2} - 2 \cdot (\eta+3) \cdot B_{\eta+1} + (\eta+2) \cdot B_\eta)$$

$$L_4^\eta = \frac{(\eta+4)}{24} \cdot \left( (\eta+6) \cdot (\eta+5) \cdot B_{\eta+3} - 3 \cdot (\eta+5) \cdot (\eta+4) \cdot B_{\eta+2} + \right. \\ \left. 3 \cdot (\eta+4) \cdot (\eta+3) \cdot B_{\eta+1} - (\eta+3) \cdot (\eta+2) \cdot B_\eta \right)$$

where  $B_\eta = (\eta+1) \cdot b_\eta$  and  $b_\eta$  represent the natural estimators expressed by the L-moments method. For  $\eta = 0$ , the method become the L-moments method.

**The frequency factors for the analyzed distributions.**

Table S1 presents the frequency factors  $K_p(p)$  for the LH-moments.

**Table S1.** Frequency factors.

| Distr. | LH-moments (first order)                                                                                                                                                                                                                                                                                                                                                                                                                                                                                                                                                                                                                              | LH-moments (second order)                                                                                                                                                                                                                                                                                                                                                                                                                                                                                                                                                                                                                                                                                                                                                                                                               |
|--------|-------------------------------------------------------------------------------------------------------------------------------------------------------------------------------------------------------------------------------------------------------------------------------------------------------------------------------------------------------------------------------------------------------------------------------------------------------------------------------------------------------------------------------------------------------------------------------------------------------------------------------------------------------|-----------------------------------------------------------------------------------------------------------------------------------------------------------------------------------------------------------------------------------------------------------------------------------------------------------------------------------------------------------------------------------------------------------------------------------------------------------------------------------------------------------------------------------------------------------------------------------------------------------------------------------------------------------------------------------------------------------------------------------------------------------------------------------------------------------------------------------------|
| DG     | $\frac{\left((1-p)^{\frac{1}{\gamma}} - 1\right)^{\frac{1}{\alpha}} - \frac{\Gamma\left(2 \cdot \gamma + \frac{1}{\alpha}\right) \cdot \Gamma\left(1 - \frac{1}{\alpha}\right)}{\Gamma(2 \cdot \gamma)}}{\frac{3}{2} \cdot \Gamma\left(1 - \frac{1}{\alpha}\right) \cdot \left(\frac{\Gamma\left(3 \cdot \gamma + \frac{1}{\alpha}\right)}{\Gamma(3 \cdot \gamma)} - \frac{\Gamma\left(2 \cdot \gamma + \frac{1}{\alpha}\right)}{\Gamma(2 \cdot \gamma)}\right)}$                                                                                                                                                                                     | $\frac{\left((1-p)^{\frac{1}{\gamma}} - 1\right)^{\frac{1}{\alpha}} - \frac{\Gamma\left(3 \cdot \gamma + \frac{1}{\alpha}\right) \cdot \Gamma\left(1 - \frac{1}{\alpha}\right)}{\Gamma(3 \cdot \gamma)}}{2 \cdot \Gamma\left(1 - \frac{1}{\alpha}\right) \cdot \left(\frac{\Gamma\left(4 \cdot \gamma + \frac{1}{\alpha}\right)}{\Gamma(4 \cdot \gamma)} - \frac{\Gamma\left(3 \cdot \gamma + \frac{1}{\alpha}\right)}{\Gamma(3 \cdot \gamma)}\right)}$                                                                                                                                                                                                                                                                                                                                                                                 |
| PR     | $\frac{\left(p^{\frac{1}{\alpha}} - 1\right)^{\frac{1}{\alpha}} - \frac{1}{\alpha} \cdot \Gamma\left(\frac{1}{\alpha}\right) \cdot \left(\frac{2 \cdot \Gamma\left(\alpha - \frac{1}{\alpha}\right)}{\Gamma(\alpha)} - \frac{\Gamma\left(2 \cdot \alpha - \frac{1}{\alpha}\right)}{\Gamma(2 \cdot \alpha)}\right)}{\frac{3}{2} \cdot \Gamma\left(\frac{1}{\alpha}\right) \cdot \left(\frac{\Gamma\left(3 \cdot \alpha - \frac{1}{\alpha}\right)}{2 \cdot \Gamma(3 \cdot \alpha)} - \frac{\Gamma\left(2 \cdot \alpha - \frac{1}{\alpha}\right)}{\Gamma(2 \cdot \alpha)} + \frac{\Gamma\left(\alpha - \frac{1}{\alpha}\right)}{\Gamma(\alpha)}\right)}$ | $\frac{\left(p^{\frac{1}{\alpha}} - 1\right)^{\frac{1}{\alpha}} - \frac{1}{\alpha} \cdot \Gamma\left(\frac{1}{\alpha}\right) \cdot \left(\frac{\Gamma\left(3 \cdot \alpha - \frac{1}{\alpha}\right)}{\Gamma(3 \cdot \alpha)} - \frac{3 \cdot \Gamma\left(2 \cdot \alpha - \frac{1}{\alpha}\right)}{\Gamma(2 \cdot \alpha)} + \frac{3 \cdot \Gamma\left(\alpha - \frac{1}{\alpha}\right)}{\Gamma(\alpha)}\right)}{2 \cdot \Gamma\left(\frac{1}{\alpha}\right) \cdot \left(\frac{3 \cdot \Gamma\left(3 \cdot \alpha - \frac{1}{\alpha}\right)}{\Gamma(3 \cdot \alpha)} - \frac{\Gamma\left(4 \cdot \alpha - \frac{1}{\alpha}\right)}{\Gamma(4 \cdot \alpha)} - \frac{3 \cdot \Gamma\left(2 \cdot \alpha - \frac{1}{\alpha}\right)}{\Gamma(2 \cdot \alpha)} + \frac{\Gamma\left(\alpha - \frac{1}{\alpha}\right)}{\Gamma(\alpha)}\right)}$ |
| IPR    | $\frac{\left(\frac{(1-p)^{\frac{1}{\alpha}}}{1 - (1-p)^{\frac{1}{\alpha}}}\right)^{\frac{1}{\alpha}} - \frac{\Gamma\left(2 \cdot \alpha + \frac{1}{\alpha}\right) \cdot \Gamma\left(1 - \frac{1}{\alpha}\right)}{\Gamma(2 \cdot \alpha)}}{\frac{3}{2} \cdot \Gamma\left(1 - \frac{1}{\alpha}\right) \cdot \left(\frac{\Gamma\left(3 \cdot \alpha + \frac{1}{\alpha}\right)}{\Gamma(3 \cdot \alpha)} - \frac{\Gamma\left(2 \cdot \alpha + \frac{1}{\alpha}\right)}{\Gamma(2 \cdot \alpha)}\right)}$                                                                                                                                                    | $\frac{\left(\frac{(1-p)^{\frac{1}{\alpha}}}{1 - (1-p)^{\frac{1}{\alpha}}}\right)^{\frac{1}{\alpha}} - \frac{\Gamma\left(3 \cdot \alpha + \frac{1}{\alpha}\right) \cdot \Gamma\left(1 - \frac{1}{\alpha}\right)}{\Gamma(3 \cdot \alpha)}}{2 \cdot \Gamma\left(1 - \frac{1}{\alpha}\right) \cdot \left(\frac{\Gamma\left(4 \cdot \alpha + \frac{1}{\alpha}\right)}{\Gamma(4 \cdot \alpha)} - \frac{\Gamma\left(3 \cdot \alpha + \frac{1}{\alpha}\right)}{\Gamma(3 \cdot \alpha)}\right)}$                                                                                                                                                                                                                                                                                                                                                |
| BR4    | $\frac{\left((1-p)^{-\frac{1}{\alpha}} - 1\right)^{\frac{1}{\beta}} - \frac{\Gamma\left(2 \cdot \alpha + \frac{1}{\beta}\right) \cdot \Gamma\left(1 - \frac{1}{\beta}\right)}{\Gamma(2 \cdot \alpha)}}{\frac{3}{2} \cdot \Gamma\left(1 - \frac{1}{\beta}\right) \cdot \left(\frac{\Gamma\left(3 \cdot \alpha + \frac{1}{\beta}\right)}{\Gamma(3 \cdot \alpha)} - \frac{\Gamma\left(2 \cdot \alpha + \frac{1}{\beta}\right)}{\Gamma(2 \cdot \alpha)}\right)}$                                                                                                                                                                                          | $\frac{\left((1-p)^{-\frac{1}{\alpha}} - 1\right)^{\frac{1}{\beta}} - \frac{\Gamma\left(3 \cdot \alpha + \frac{1}{\beta}\right) \cdot \Gamma\left(1 - \frac{1}{\beta}\right)}{\Gamma(3 \cdot \alpha)}}{2 \cdot \Gamma\left(1 - \frac{1}{\beta}\right) \cdot \left(\frac{\Gamma\left(4 \cdot \alpha + \frac{1}{\beta}\right)}{\Gamma(4 \cdot \alpha)} - \frac{\Gamma\left(3 \cdot \alpha + \frac{1}{\beta}\right)}{\Gamma(3 \cdot \alpha)}\right)}$                                                                                                                                                                                                                                                                                                                                                                                      |

### The PR frequency factor.

For the L-moments method, the frequency factor can be estimated by:

$$K_p(p) = a + b \cdot \tau_3 + c \cdot \tau_3^2 + d \cdot \tau_3^3 + e \cdot \tau_3^4 + f \cdot \tau_3^5 + g \cdot \tau_3^6 + h \cdot \tau_3^7 + i \cdot \tau_3^8$$

**Table S2.** The frequency factor of the PR distribution, for the L-moments method.

| P<br>[%] | a          | b          | C          | d           | e            | f           | g            | h           | i            |
|----------|------------|------------|------------|-------------|--------------|-------------|--------------|-------------|--------------|
| 0.01     | 5.40984    | 93.06172   | -721.3554  | 5707.80044  | -22196.09176 | 56584.03944 | -84914.76584 | 73986.01395 | -28547.80261 |
| 0.1      | 6.35512    | 4.3471     | 183.49546  | -779.47739  | 2855.20823   | -5627.45694 | 6812.43663   | -4455.90433 | 999.73507    |
| 0.5      | 4.7418082  | 9.7917006  | 29.4658093 | -47.9076904 | 140.6917135  | -137.92078  | -            | -           | -            |
| 1        | 3.9973248  | 11.6282905 | -8.6795797 | 48.4005748  | -42.2810608  | -14.153624  | -            | -           | -            |
| 2        | 3.5411782  | 8.0411906  | -8.5389187 | 35.8048583  | -52.1522156  | 12.2677171  | -            | -           | -            |
| 3        | 3.2709699  | 5.7449394  | -5.2761016 | 19.8176078  | -36.5282421  | 11.9531622  | -            | -           | -            |
| 5        | 2.8841511  | 3.3115647  | -2.2754563 | 4.3196483   | -16.4631117  | 7.2179531   | -            | -           | -            |
| 10       | 2.2787657  | 0.5901421  | 0.5374674  | -7.8957795  | 3.4838008    | -           | -            | -           | -            |
| 20       | 1.4675792  | -0.4788507 | -2.5441964 | -0.4120804  | 0.9697476    | -           | -            | -           | -            |
| 40       | 0.4477403  | -1.6055923 | -1.184721  | 1.8904259   | -0.5477169   | -           | -            | -           | -            |
| 50       | 0.0099648  | -1.7918176 | 0.0401133  | 1.2706535   | -0.5296266   | -           | -            | -           | -            |
| 80       | -1.4899255 | -0.5705551 | 2.2793932  | -1.6433576  | 0.4248825    | -           | -            | -           | -            |
| 90       | -2.319694  | 1.5167835  | 0.1218483  | -0.3248695  | -            | -           | -            | -           | -            |

For the first level LH-moments method, the frequency factor can be estimated with:

$$K_p(p) = a + b \cdot \tau_{H3} + c \cdot \tau_{H3}^2 + d \cdot \tau_{H3}^3 + e \cdot \tau_{H3}^4 + f \cdot \tau_{H3}^5 + g \cdot \tau_{H3}^6 + h \cdot \tau_{H3}^7$$

**Table S3.** The frequency factor of the PR distribution, for the first level LH-moments.

| P<br>[%] | a          | b           | C           | d             | e            | f             | g            | h             |
|----------|------------|-------------|-------------|---------------|--------------|---------------|--------------|---------------|
| 0.01     | 328.89326  | -5942.86337 | 45868.19161 | -190568.58841 | 466725.05262 | -673630.33506 | 536894.23988 | -182067.75228 |
| 0.1      | 0.46983    | 82.57344    | -451.78112  | 1790.32986    | -3367.88915  | 3372.13361    | -678.47745   | -934.05164    |
| 0.5      | 3.9068     | 4.95138     | 48.26228    | -128.59639    | 291.58468    | -251.44745    | -            | -             |
| 1        | 2.61715    | 16.79599    | -39.93594   | 109.51929     | -95.6647     | -8.21658      | -            | -             |
| 2        | 2.5208     | 11.0132     | -29.29168   | 82.33333      | -106.79278   | 33.04472      | -            | -             |
| 3        | 3.13098    | -0.89391    | 17.74291    | -26.05593     | 0.90863      | -             | -            | -             |
| 5        | 2.60007    | -1.06978    | 12.17813    | -25.86213     | 8.87753      | -             | -            | -             |
| 10       | 1.72362    | -0.42895    | 1.0052      | -10.11637     | 5.82681      | -             | -            | -             |
| 20       | 0.75096    | -0.72032    | -4.30071    | 2.78366       | -            | -             | -            | -             |
| 40       | -0.4558519 | -2.5056937  | 1.6923683   | 0.0268363     | -            | -             | -            | -             |
| 50       | -1.1139134 | -2.0740464  | 2.7934691   | -0.8275351    | -            | -             | -            | -             |
| 80       | -3.7549821 | 3.8300751   | -1.1023443  | -0.1675685    | -            | -             | -            | -             |
| 90       | -5.2954083 | 8.9500255   | -7.0887011  | 2.2945484     | -            | -             | -            | -             |

### The IPR frequency factor.

For the L-moments method, the frequency factor can be estimated using by:

$$K_p(p) = a + b \cdot \tau_3 + c \cdot \tau_3^2 + d \cdot \tau_3^3 + e \cdot \tau_3^4 + f \cdot \tau_3^5 + g \cdot \tau_3^6 + h \cdot \tau_3^7 + i \cdot \tau_3^8$$

**Table S4.** The frequency factor of the IPR distribution, for the L-moments method.

| P [%] | a          | b          | C           | d            | e            | f            | g            | h           | i            |
|-------|------------|------------|-------------|--------------|--------------|--------------|--------------|-------------|--------------|
| 0.01  | -345.2689  | 6562.6442  | -51661.2117 | 226645.6636  | -598680.6533 | 986650.2494  | -990573.1864 | 559435.1263 | -138025.5546 |
| 0.1   | -52.6697   | 1046.8422  | -7817.9022  | 33304.0462   | -84320.3313  | 132013.698   | -124778.344  | 65284.0191  | -14679.6286  |
| 0.5   | 2.9526714  | 21.225288  | 3.5005404   | 27.3987597   | -31.0664423  | 27.9923751   | -52.59999    | -           | -            |
| 1     | 3.5500577  | 9.3630888  | 36.0627588  | -102.9663387 | 168.1820787  | -151.1667814 | 36.19326     | -           | -            |
| 2     | 3.5123821  | 4.8775520  | 28.4044598  | -95.8057252  | 151.0283175  | -133.6328173 | 40.73529     | -           | -            |
| 3     | 2.6786283  | 12.1156060 | -25.2840454 | 43.1213241   | -46.7740367  | 13.2066034   | -            | -           | -            |
| 5     | 2.6171426  | 7.2621147  | -18.2335705 | 28.341378    | -31.6462423  | 10.6978611   | -            | -           | -            |
| 10    | 2.3013644  | 1.8122701  | -8.5373716  | 11.3635705   | -13.1343828  | 5.21305      | -            | -           | -            |
| 20    | 1.6379728  | -1.6030694 | -1.3897333  | 1.1366457    | -1.9847799   | 1.21019      | -            | -           | -            |
| 40    | 0.5076777  | -2.4125272 | 1.6401858   | -2.0314792   | 1.7419422    | -0.4447      | -            | -           | -            |
| 50    | -0.0275478 | -1.7300404 | 0.5294398   | 0.2286324    | -            | -            | -            | -           | -            |
| 80    | -1.5538165 | 0.1722079  | 0.5190002   | -0.1345256   | -            | -            | -            | -           | -            |
| 90    | -2.2804644 | 1.4965624  | -0.0578446  | -0.1571371   | -            | -            | -            | -           | -            |

For the first level LH-moments method, the frequency factor can be estimated by:

$$K_p(p) = a + b \cdot \tau_{H3} + c \cdot \tau_{H3}^2 + d \cdot \tau_{H3}^3 + e \cdot \tau_{H3}^4 + f \cdot \tau_{H3}^5 + g \cdot \tau_{H3}^6 + h \cdot \tau_{H3}^7 + i \cdot \tau_{H3}^8$$

**Table S5.** The frequency factor of the IPR distribution, for the first level LH-moments.

| P [%] | a         | b         | C            | d          | e             | f           | g            | h            | i            |
|-------|-----------|-----------|--------------|------------|---------------|-------------|--------------|--------------|--------------|
| 0.01  | -767.6908 | 13654.387 | -104036.3744 | 447822.297 | -1189551.1958 | 2010036.758 | -2116441.842 | 1282341.5755 | -345882.5164 |
| 0.1   | -14.4065  | 268.1497  | -1603.7447   | 5965.8294  | -12749.9538   | 17193.6413  | -14129.8029  | 6956.0145    | -2087.5865   |
| 0.5   | 4.36425   | -15.78366 | 182.17918    | -469.89640 | 707.87903     | -496.25482  | 54.96872     | -            | -            |
| 1     | 3.22765   | -1.78049  | 89.30195     | -269.96465 | 455.38503     | -404.02723  | 112.73221    | -            | -            |
| 2     | 1.18714   | 22.45955  | -62.35309    | 122.82644  | -127.67726    | 36.11891    | -            | -            | -            |
| 3     | 3.02675   | 1.104     | 10.93435     | -18.56752  | -1.71188      | -           | -            | -            | -            |
| 5     | 2.83453   | -1.46458  | 10.65611     | -22.64894  | 7.28810       | -           | -            | -            | -            |
| 10    | 2.147555  | -2.734561 | 5.042787     | -12.925056 | 6.431907      | -           | -            | -            | -            |
| 20    | 1.095351  | -3.268998 | 2.180755     | -4.185255  | 2.702168      | -           | -            | -            | -            |
| 40    | -0.555994 | -2.045112 | 1.100031     | 0.247911   | -             | -           | -            | -            | -            |
| 50    | -1.262905 | -1.269213 | 1.526737     | -0.203663  | -             | -           | -            | -            | -            |
| 80    | -3.703033 | 3.69368   | -1.141327    | -          | -             | -           | -            | -            | -            |
| 90    | -4.825085 | 6.246594  | -2.601531    | -          | -             | -           | -            | -            | -            |

### The L-moments diagram.

Figure S1 shows the L-moments diagram.

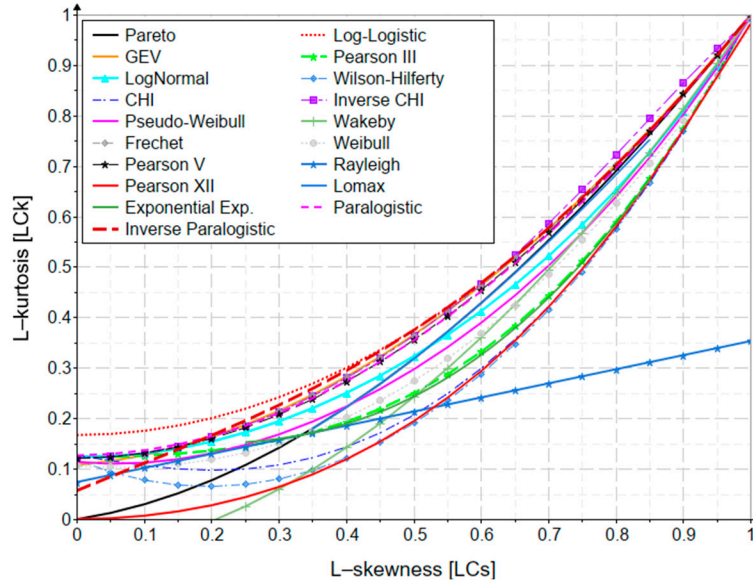

**Figure S1.** The variation diagram for L-skewness and L-kurtosis.

Paralogistic:

$$\tau_4 = 0.1262814 + 0.0078207 \cdot \tau_3 + 0.9179335 \cdot \tau_3^2 - 0.0328508 \cdot \tau_3^3 - 0.0190348 \cdot \tau_3^4$$

Inverse Paralogistic:

$$\tau_4 = 0.0577651 + 0.5568896 \cdot \tau_3 - 0.2198157 \cdot \tau_3^2 + 0.9069583 \cdot \tau_3^3 - 0.3025029 \cdot \tau_3^4$$

In the case of the Dagum and Burr distributions, unique curves regarding the variation of these 2 statistical indicators cannot be established, because they are characterized by two shape parameters.

### The first level LH-moments diagram.

Figure S2 shows the first level LH-moments diagram.

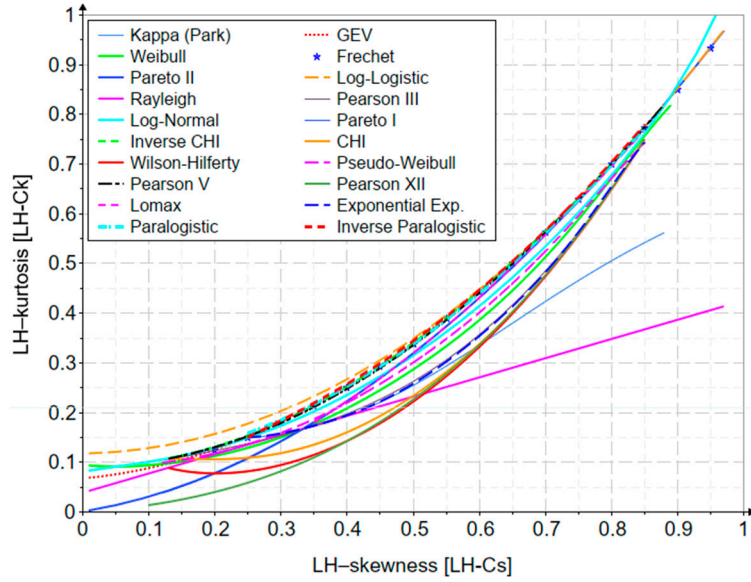

**Figure S2.** The variation diagram for LH-skewness and LH-kurtosis.

Paralogistic:

$$\tau_{H4} = 0.0949132 + 0.0207519 \cdot \tau_{H3} + 0.9413469 \cdot \tau_{H3}^2 - 0.0225815 \cdot \tau_{H3}^3 + 0.0002503 \cdot \tau_{H3}^4 + 0.0023262 \cdot \tau_{H3}^5 - 0.027725 \cdot \tau_{H3}^6 + 0.0084845 \cdot \tau_{H3}^7$$

Inverse Paralogistic:

$$\tau_{H4} = 0.0111007 + 0.4687435 \cdot \tau_{H3} + 0.5140639 \cdot \tau_{H3}^2 - 1.2020277 \cdot \tau_{H3}^3 + 2.866485 \cdot \tau_{H3}^4 - 2.0532499 \cdot \tau_{H3}^5 + 0.2781232 \cdot \tau_{H3}^6 + 0.1437387 \cdot \tau_{H3}^7$$

In the case of the Dagum and Burr distributions, unique curves regarding the variation of these 2 statistical indicators cannot be established, because they are characterized by two shape parameters.
